# Supplementary material
Source: PubMed Central journal article supplement (PMC3392874)
Supplement: gmb-35-1-sup-212-gfigsuppl2.pdf [file gmb-35-1-sup-212-gfigsuppl2.pdf]

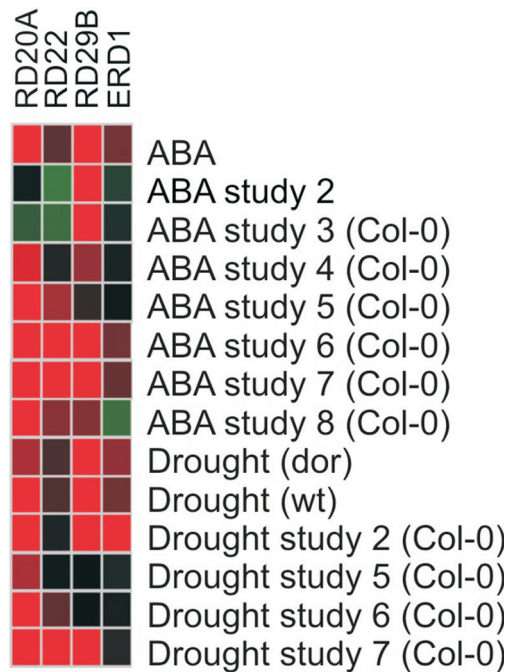

**Figure S2** - Digital expression pattern of *Arabidopsis* DMGs involved in the response to different water privation conditions and ABA stimulus, evaluated by the Genevestigator web tool. The intensity of the red color is equivalent to increase in the gene induction in response to drought stress or ABA. The increase in the intensity of the green color is equivalent to increase in the gene repression in response to drought stress or ABA. The black color indicates that it is not induced or repressed under drought stress conditions. Description of experiments: ABA: wild type (Col-0) seedlings, treated with 10  $\mu$ M ABA for 1 h; ABA study 2: Leaf samples from wild type (Col-0) plants, not watered for 7 days; ABA study 3 (Col-0): After stratification at 4  $^{\circ}$ C for 4 days, wild type seeds were allowed to germinate on the MS-2% sucrose plate containing 0.5  $\mu$ M ABA for two days; ABA study 4 (Col-0): wild type leaves of 4 week-old plants, sprayed with 50  $\mu$ M ABA. After 4 h, samples were collected; ABA study 5 (Col-0): Plant samples of Col-0 grown for 2 weeks on MS agar medium with 3% sucrose and then treated with 100  $\mu$ M ABA for 1 h; ABA study 6 (Col-0): Plant samples of wild type (Col-0) grown for 2 weeks on MS agar medium with 3% sucrose and then exposed to dehydration stress for 1 h; ABA study 7 (Col-0): Isolated guard cell samples of 5-week-old wild-type plants, treated with 50 mM ABA for 3 h; ABA study 8 (Col-0): Excised leaf samples of 5-week-old wild-type plants, treated with 50 mM ABA for 3 h. Drought (dor): Rosette leaf samples of dor plants, grown under normal watering conditions for 24 days and then stressed by completely depriving them of irrigation for 10 days; Drought (wt): Rosette leaf samples of wild type (Col-0) plants, grown under normal watering conditions for 24 days and then stressed by completely depriving them of irrigation for 10 days; Drought study 2 (Col-0): Leaf samples from wild-type (Col 0) plants, not watered for 7 days; Drought study 5 (Col-0): Rosette leaf samples of dor plants, grown under normal watering conditions for 24 days and then stressed by completely depriving them of irrigation for 10 days; Drought study 6 (Col-0): Plant samples of Col-0 grown for 2 weeks on MS agar medium with 3% sucrose and then exposed to dehydration stress for 1 h; Drought study 7 (Col-0): Plant samples of Col-0 grown for 2 weeks on MS agar medium with 3% sucrose and then exposed to dehydration stress for 4 h.
