# Supplementary material
Source: PubMed Central journal article supplement (PMC3392874)
Supplement: gmb-35-1-sup-212-suppl1.pdf [file gmb-35-1-sup-212-suppl1.pdf]

**Table S1** - Cis-regulatory elements responsive to drought stress, salinity stress, osmotic stress and ABA.

| <b>Pattern</b> | <b>Description pattern</b>                                                                                                                       |
|----------------|--------------------------------------------------------------------------------------------------------------------------------------------------|
| ACGT           | This sequence required for etiolation-induced expression of erd1.                                                                                |
| ACCGAC         | DBF2" bound to "DRE2"; rab17 is expressed during late embryogenesis, and is induced by ABA.                                                      |
| WAACCA         | MYB recognition site found in the promoters of the dehydration-responsive gene rd22.                                                             |
| CANNTG         | MYC recognition site found in the promoters of the dehydration-responsive gene rd22 and many other genes in Arabidopsis; Binding site of ATMYC2. |
| ACGTGKC        | DRE and ABRE are interdependent in the ABA-responsive expression of the rd29A.                                                                   |
| YAACKG         | MYB recognition site found in the promoters of the dehydration-responsive gene rd22.                                                             |
| RYACGTGGYR     | ABRE in Arabidopsis dehydration-responsive gene rd22.                                                                                            |
| CCACGTGG       | ABRE; ABA and water-stress responses.                                                                                                            |
| YACGTGGC       | ABA responsive element found in the promoter of stress regulated.                                                                                |
| CACATG         | MYC binding site in rd22 gene of Arabidopsis thaliana; ABA-induction.                                                                            |
| CATGTG         | MYC recognition sequence necessary for expression of erd1 in dehydrated Arabidopsis.                                                             |
| CNGTTR         | ATMYB2 is involved in regulation of genes that are responsive to water stress in Arabidopsis.                                                    |
| CCGAC          | Core of low temperature responsive element (LTRE) of cor15a gene in Arabidopsis.                                                                 |
| TACCGACAT      | Related to responsiveness to drought, low-temperature or high-salt stress.                                                                       |
| TAAC TG        | ATMYB2 is involved in regulation of genes that are responsive to water stress in Arabidopsis.                                                    |
| CTAACCA        | Binding site for MYB in dehydration-responsive gene, rd22.                                                                                       |
| WK[TAGC]CGTR   | NAC binding site (NACBS).                                                                                                                        |

Note: The symbol W was used in addition to A or T; the symbol R was used in addition to A or G; the symbol Y was used in addition to C or T; the symbol K was used in addition to G or T; The symbol W was used in addition to T or A; and the symbol N was used in addition to A,C,G or T.
