# Supplementary material
Source: PubMed Central journal article supplement (PMC3392874)
Supplement: gmb-35-1-sup-212-suppl2.pdf [file gmb-35-1-sup-212-suppl2.pdf]

Table S2 – Frequency of cis elements present in promoters of the DMG.

| Motif  | Data set  | Number of promoters in a each dataset | Number of promoters containing the pattern | Total number of patterns in each dataset | Promoter mean |
|--------|-----------|---------------------------------------|--------------------------------------------|------------------------------------------|---------------|
| ACGT   | BG        | 77222                                 | 55801 (72.26%)                             | 233388                                   | 3.02          |
|        | Cluster 1 | 3                                     | 3 (100%)                                   | 16                                       | 5.33          |
| ACCGAC | BG        | 77222                                 | 8254 (10.7%)                               | 10276                                    | 0.13          |
|        | Cluster 1 | 3                                     | 2 (66.7%)                                  | 2                                        | 0.66          |
| WAACCA | BG        | 77222                                 | 58808 (76.2%)                              | 121330                                   | 1.56          |
|        | Cluster 1 | 3                                     | 3 (100%)                                   | 6                                        | 2             |
| CANNTG | BG        | 77222                                 | 73865 (95.7%)                              | 540426                                   | 7.07          |
|        | Cluster 1 | 3                                     | 3 (100%)                                   | 24                                       | 7.99          |

Note: All analyzed promoter sequences presented 1,000 bp and POBO was run with the following parameters: Number pseudoclusters 50 and length of the background promoter 1,000 bp, bootstrap 1000. Calculated t-test using the linked on line GrapPad web site: <http://www.graphpad.com/quickcalcs/DistMenu.cfm>. P<0.0001. The symbol W was used in addition to A or T and the symbol N was used in additional to A,C,G or T. BG - background set that comprise all promoters regions of the *G. max* genome. Cluster 1 – promoters set that comprise the promoters regions of the GOI genes.
