# Supplementary material
Source: PubMed Central journal article supplement (PMC3392874)

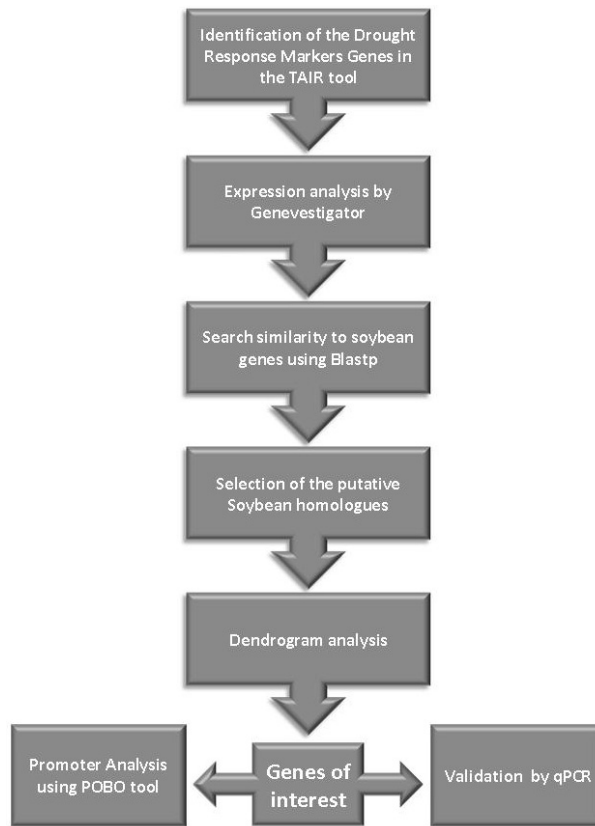

**Figure S1** - Search strategy for DMGs involved in the soybean response to water deficit.

Supplement: gmb-35-1-sup-212-gfigsuppl1.pdf [file gmb-35-1-sup-212-gfigsuppl1.pdf]
